# Supplementary material for: In Silico Screening of Metal−Organic Frameworks and Zeolites for He/N2 Separation
Source: MDPI journal article supplement (doi:10.3390/molecules28010020), 2022-12-20
Supplement: s1 [file s1]

# **Supplementary Materials for**

## **In silico screening of metal–organic frameworks and zeolites for He/N<sub>2</sub> separation**

Ivan V. Grenev<sup>1,2,\*</sup>, Vladimir Yu Gavrilov<sup>2</sup>

(1) Novosibirsk State University, Pirogova str. 1, Novosibirsk 630090, Russia

(2) Boreskov Institute of Catalysis, Ac. Lavrentiev av. 5, Novosibirsk 630090, Russia

\* - author for correspondence, [greneviv@catalysis.ru](mailto:greneviv@catalysis.ru)

### **Contents:**

|                                                                                                                                                         |    |
|---------------------------------------------------------------------------------------------------------------------------------------------------------|----|
| Section S1. Comparison of molecular simulations and experimental data .....                                                                             | 2  |
| Section S2. Structure – adsorption performance relationships .....                                                                                      | 5  |
| Section S3. Comparison of ideal and mixture adsorption selectivities .....                                                                              | 8  |
| Section S4. Relationship between API and APS metrics .....                                                                                              | 9  |
| Section S5. Comparison of the structural properties PDF for the best 50 MOF structures for<br>VSA and PSA with all MOF structures.....                  | 10 |
| Section S6. Characteristics of Top 10 MOFs for adsorption-based separation .....                                                                        | 12 |
| Section S7. Effect of electrostatic interaction on He/N <sub>2</sub> separation.....                                                                    | 13 |
| Section S8. Structure – diffusion performance relationships.....                                                                                        | 15 |
| Section S9. Comparison of the structural properties PDF for the best 50 MOF structures for<br>membrane separation process with all MOF structures. .... | 17 |
| Section S10. Chemical composition – membrane separation performance relationships. ....                                                                 | 18 |
| Section S11. Characteristics of Top 10 MOFs for membrane-based separation. ....                                                                         | 19 |
| References.....                                                                                                                                         | 20 |

## Section S1. Comparison of molecular simulations and experimental data

**Table S1.** Comparison of adsorption capacities, adsorption selectivity and APS of zeolites 5A,13X and 4A for He and N<sub>2</sub> and CH<sub>4</sub> at 100 1 bar and room temperature.

| Zeolite name | $N_{He}(1 \text{ bar})$<br>[mol/kg] [1] | $N_{N_2}(1 \text{ bar})$<br>[mol/kg] [2] | $S_{ads,N_2/He}^{single}$ | $\Delta N_{N_2}$ (VSA)<br>[mol/kg] | APS [mol/kg] |
|--------------|-----------------------------------------|------------------------------------------|---------------------------|------------------------------------|--------------|
| Zeolite 5A   | $1.17 \times 10^{-3}$                   | 0.536                                    | 458                       | 0.439                              | 201          |
| Zeolite 13X  | $1.31 \times 10^{-3}$                   | 0.290                                    | 221                       | 0.261                              | 58           |
| Zeolite 4A   | $5.75 \times 10^{-3}$                   | 0.313                                    | 54                        | 0.275                              | 15           |

**Table S2.** Experimental N<sub>2</sub> adsorption data for the MOFs used in Figure 1 (left).

| CCDC Identifier | MOF name         | Pressure range [bar] | Temperature [K] | Reference |
|-----------------|------------------|----------------------|-----------------|-----------|
| FIQCEN          | Cu-BTC / HKUST-1 | $P < 1$              | 298             | [3]       |
| FIQCEN          | Cu-BTC / HKUST-1 | $1 < P < 8$          | 295             | [4]       |
| EDUSIF          | IRMOF-1          | $P < 1$              | 298             | [5]       |
| EDUSIF          | IRMOF-1          | $1 < P < 20$         | 297             | [6]       |
| YUVSUE          | Bio-MOF-11       | $P < 1$              | 298             | [7]       |
| BEYSEF          | Bio-MOF-12       | $P < 1$              | 298             | [7]       |
| RUBTAK          | UIO-66           | $P < 20$             | 298             | [8]       |
| UNOBOR          | Co3(btdc)3(bpy)2 | $P < 1$              | 298             | [9]       |

**Table S3.** Experimental N<sub>2</sub> adsorption data for the zeolites used in Figure 1 (right).

| IZA Identifier | Zeolite name             | Pressure range [bar] | Temperature [K] | Reference |
|----------------|--------------------------|----------------------|-----------------|-----------|
| BEA            | Pure silica zeolite beta | $P < 1$              | 303             | [10]      |
| CHA            | Pure silica chabazite    | $P < 1$              | 303             | [10]      |
| FER            | Siliceous ferrierite     | $P < 1$              | 303             | [10]      |
| MFI            | silicalite-1             | $P < 1$              | 303             | [10]      |
| STT            | SSZ-23                   | $P < 1$              | 303             | [10]      |
| AEL            | AIPO-11                  | $P < 1$              | 296             | [11]      |
| ERI            | AIPO-17                  | $P < 1$              | 298             | [12]      |
| AEI            | AIPO-18                  | $P < 1$              | 298             | [12]      |
| ATT            | AIPO-33                  | $P < 1$              | 298             | [12]      |
| ZON            | UiO-7                    | $P < 1$              | 298             | [12]      |

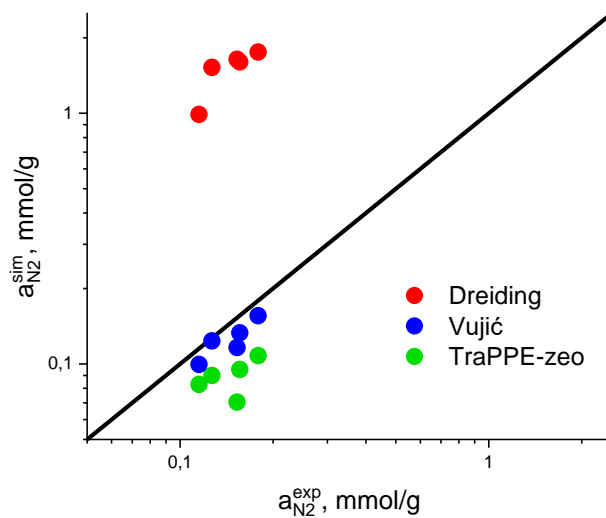

**Figure S1.** Comparison of calculated N<sub>2</sub> uptake at 303 K and 1 bar obtained using different force field models for 5 different pure silica structures (BEA, CHA, MFI, FER, STT) with the corresponding experimental data [10].

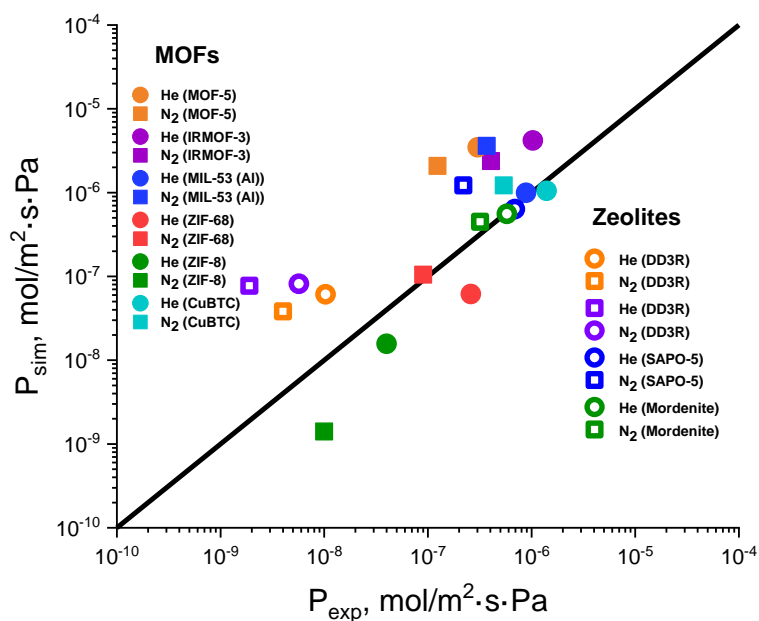

**Figure S2.** Comparison of experimental and molecular simulations data for He and N<sub>2</sub> permeance for MOFs and zeolites.

**Table S4.** Experimental He and N<sub>2</sub> permeance data for the MOFs used in Figure S2.

| CCDC Identifier | MOF name    | Molecule                | Thickness [μm] | Pressure feed [bar] | Pressure permeate [bar] | Temperature [K] | Reference |
|-----------------|-------------|-------------------------|----------------|---------------------|-------------------------|-----------------|-----------|
| FIQCEN          | CuBTC       | He (Single)             | 30             | 2                   | 1                       | 298             | [13]      |
| FIQCEN          | CuBTC       | N <sub>2</sub> (Single) | 30             | 2                   | 1                       | 298             | [13]      |
| EDUSIF          | MOF-5       | He (Single)             | 14             | 2.7                 | 1.01                    | 298             | [14]      |
| EDUSIF          | MOF-5       | N <sub>2</sub> (Single) | 14             | 2.7                 | 1.01                    | 298             | [14]      |
| QONQEQ          | MIL-53 (Al) | He (Single)             | 60             | 0.6                 | Vacuum                  | 298             | [15]      |
| QONQEQ          | MIL-53 (Al) | N <sub>2</sub> (Single) | 60             | 0.6                 | Vacuum                  | 298             | [15]      |
| GITTUZ          | ZIF-68      | He (Single)             | 40             | 2                   | 1                       | 298             | [16]      |
| GITTUZ          | ZIF-68      | N <sub>2</sub> (Single) | 40             | 2                   | 1                       | 298             | [16]      |
| OFERUN          | ZIF-8       | He (Single)             | 80             | 2                   | 1                       | 298             | [17]      |
| OFERUN          | ZIF-8       | N <sub>2</sub> (Single) | 80             | 2                   | 1                       | 298             | [17]      |
| EDUSUR          | IRMOF-3     | He (Single)             | 10             | 1                   | Vacuum                  | 298             | [18]      |
| EDUSUR          | IRMOF-3     | N <sub>2</sub> (Single) | 10             | 1                   | Vacuum                  | 298             | [18]      |

**Table S5.** Experimental He and N<sub>2</sub> permeance data for the zeolites used in Figure S2.

| IZA Identifier | Zeolite name | Molecule                | Thickness [μm] | Pressure feed [bar] | Pressure permeate [bar] | Temperature [K] | Reference |
|----------------|--------------|-------------------------|----------------|---------------------|-------------------------|-----------------|-----------|
| DDR            | DD3R         | He (Single)             | 10             | 5                   | 1                       | 301             | [19]      |
| DDR            | DD3R         | N <sub>2</sub> (Single) | 10             | 5                   | 1                       | 301             | [19]      |
| AFI            | SAPO-5       | He (Single)             | 10             | 2                   | 1                       | 298             | [20]      |
| AFI            | SAPO-5       | N <sub>2</sub> (Single) | 10             | 2                   | 1                       | 298             | [20]      |
| MOR            | Mordenite    | He (Single)             | 20             | 2                   | 1                       | 298             | [21]      |
| MOR            | Mordenite    | N <sub>2</sub> (Single) | 20             | 2                   | 1                       | 298             | [21]      |



## Section S2. Structure – adsorption performance relationships

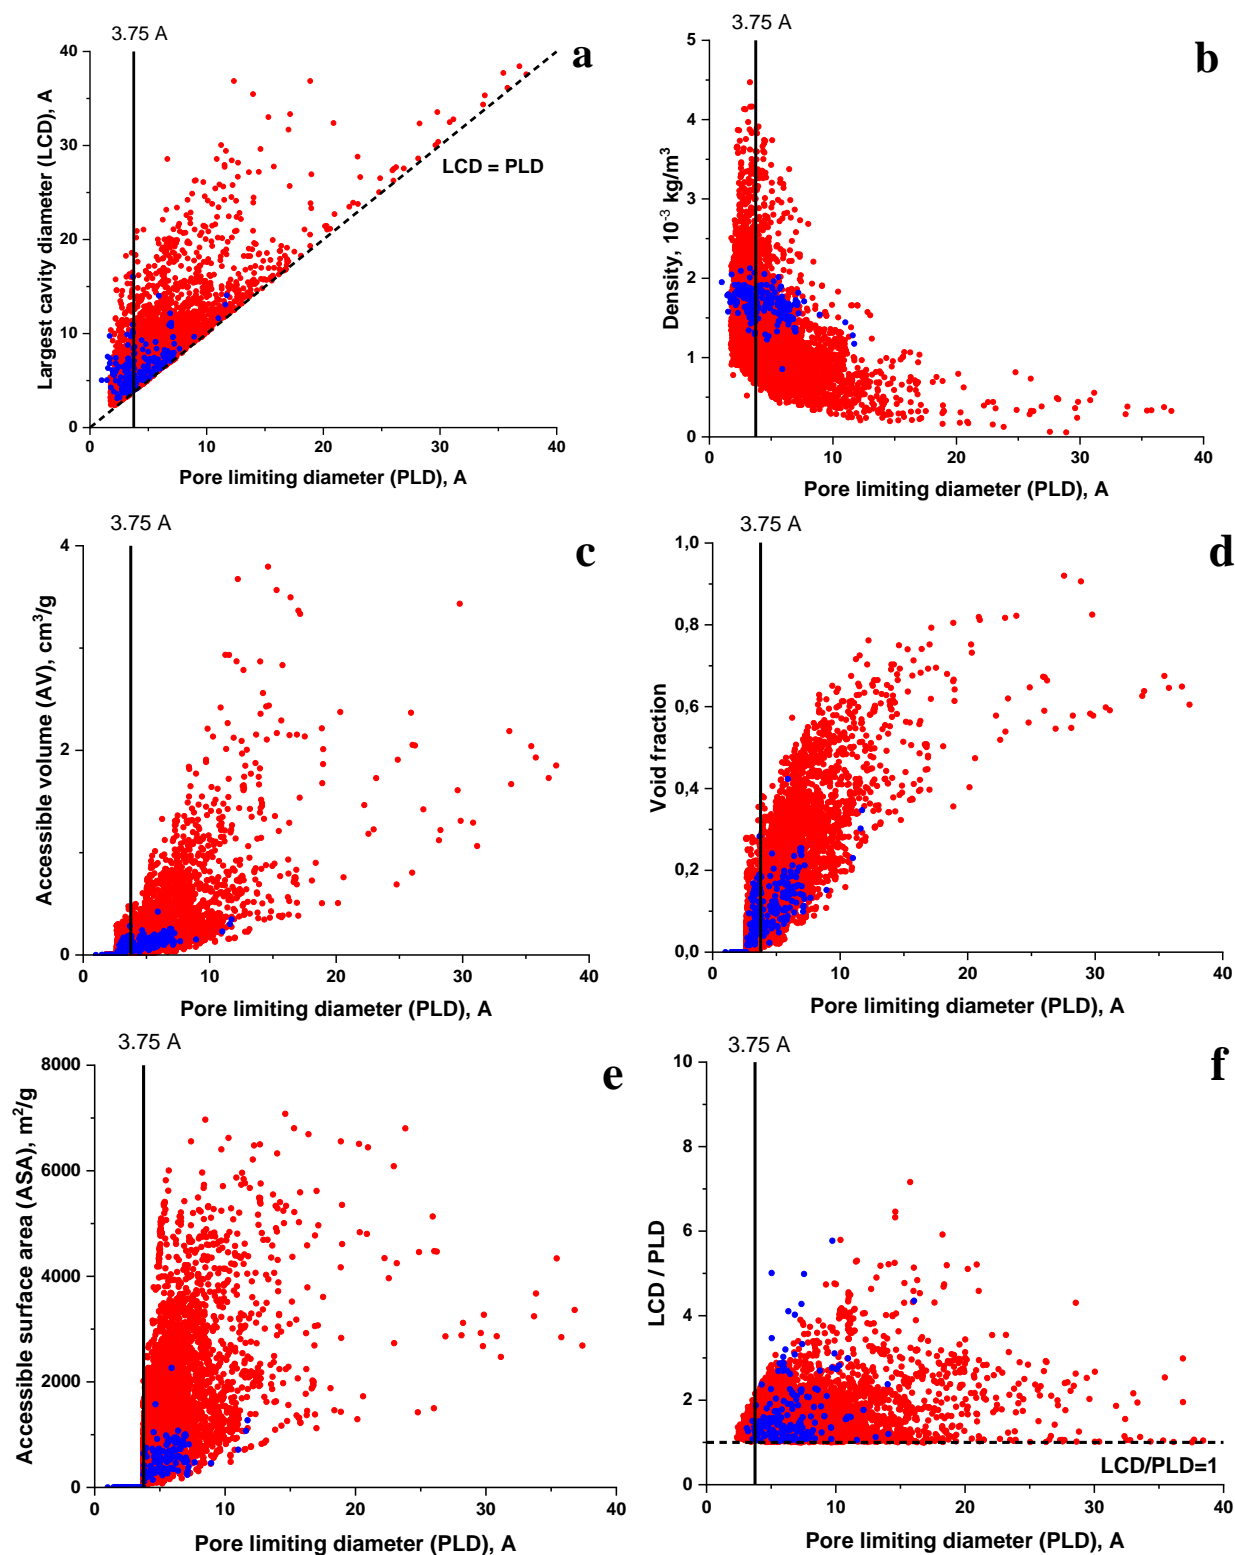

**Figure S3.** Comparison of the structural parameters of the initial MOF (red dots) and zeolites (blue dots) databases.

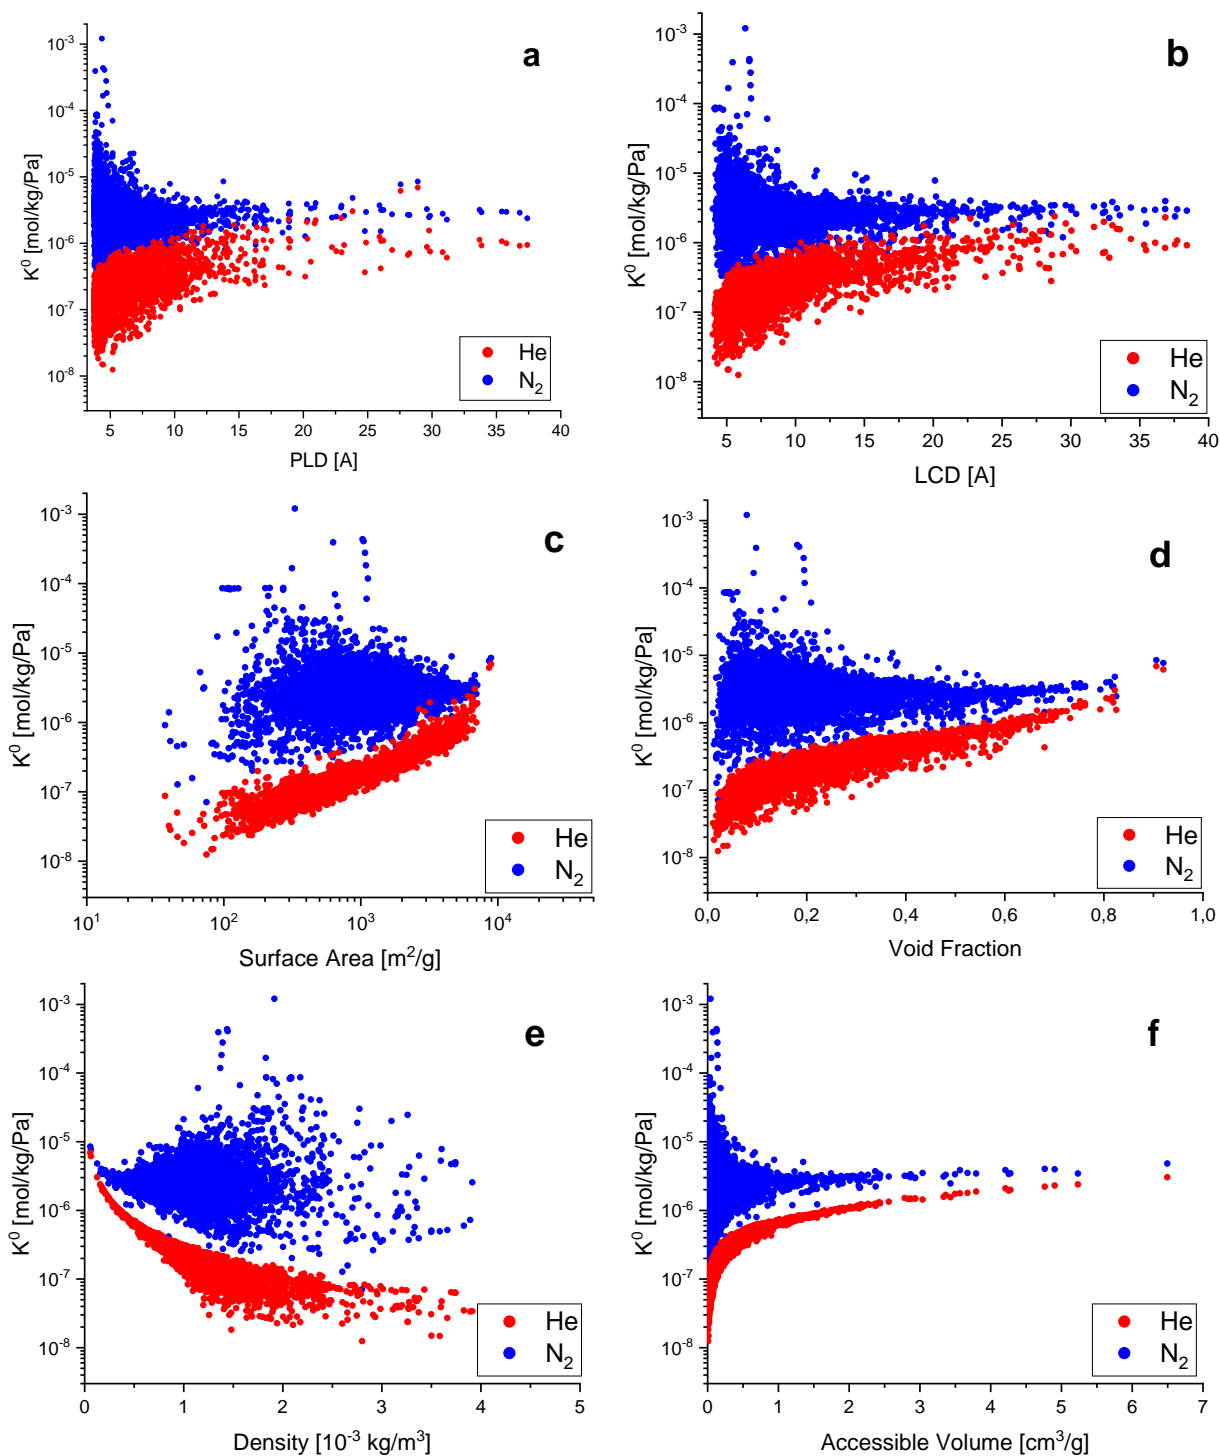

**Figure S4.** Henry's constant ( $K^0$ ) versus pore limiting diameter (a), largest cavity diameter (b), accessible surface area (c), porosity (d), density (e) and accessible volume (f) for He and  $N_2$ .

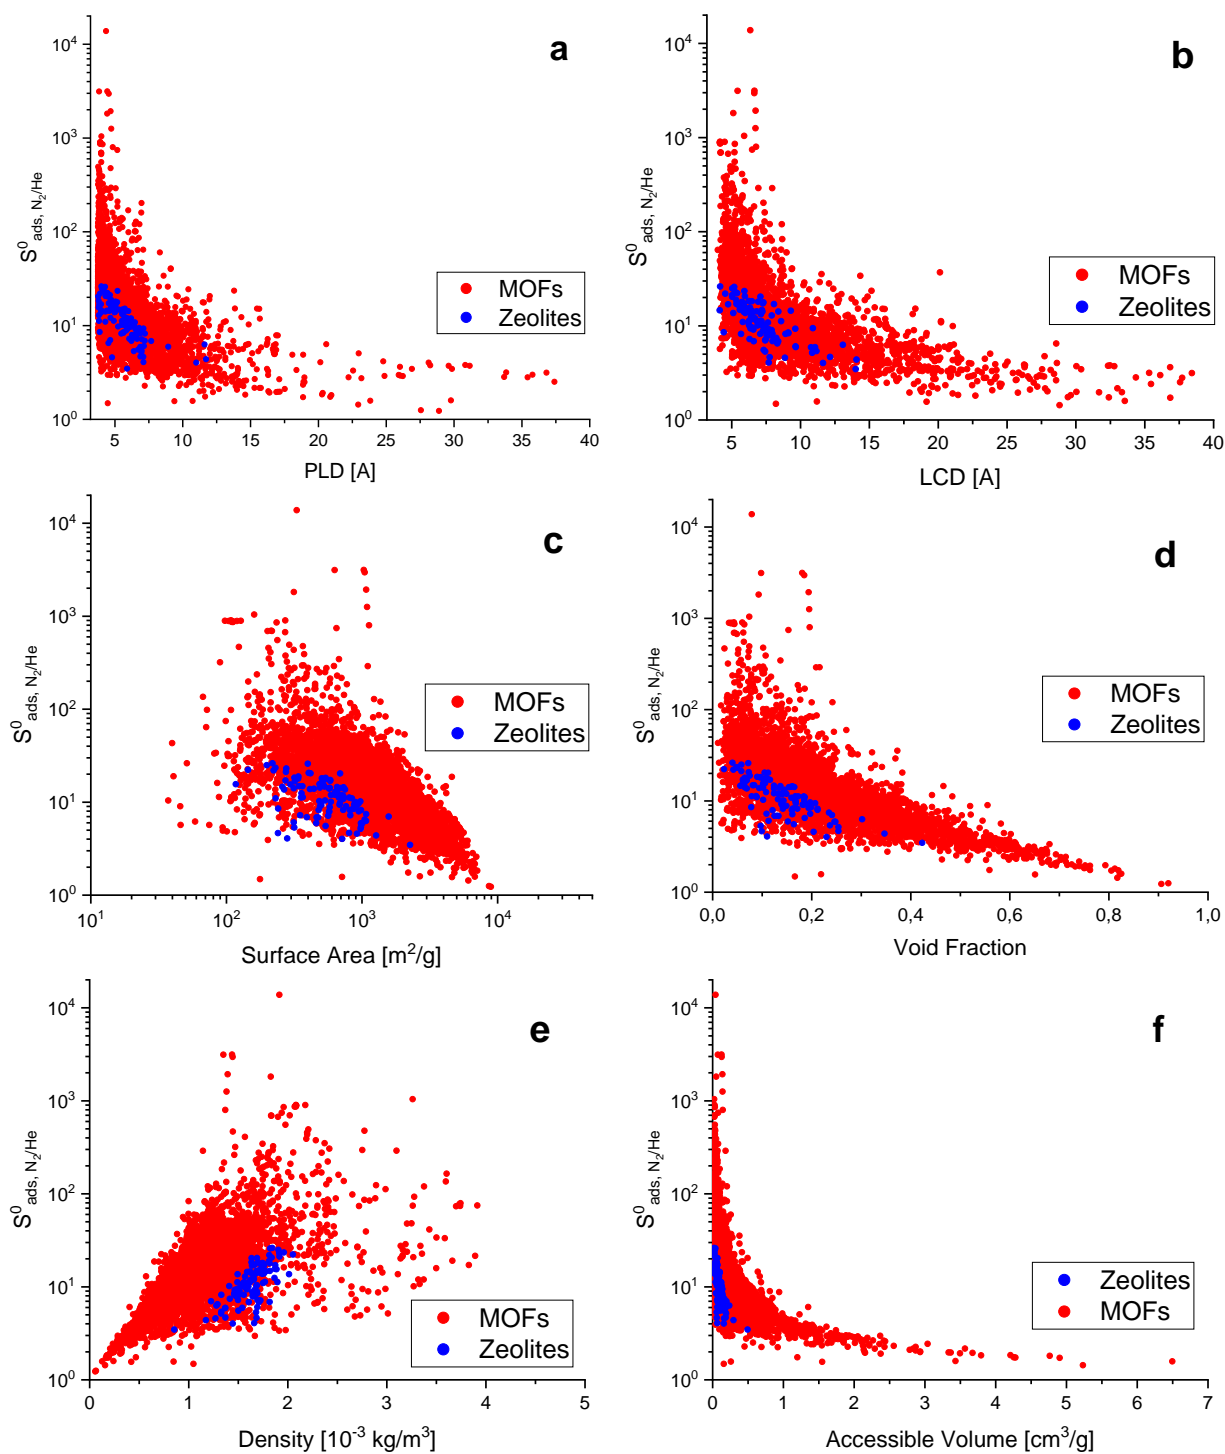

**Figure S5.** Adsorption selectivity ( $S^0_{ads, N_2/He}$ ) versus pore limiting diameter (a), largest cavity diameter (b), accessible surface area (c), porosity (d), density (e) and accessible volume (f) for MOF and zeolite structures.

### Section S3. Comparison of ideal and mixture adsorption selectivities

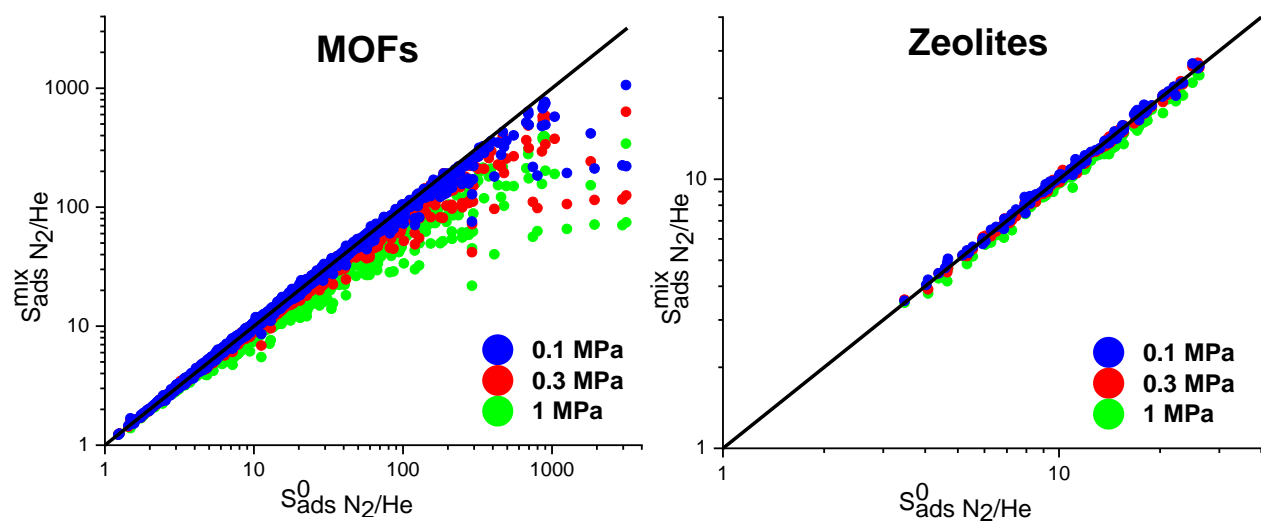

**Figure S6.** Comparison of ideal  $S_{ads, N_2/He}^0$  and  $S_{ads, N_2/He}^{mix}$  mixture adsorption selectivities of MOFs (left) and zeolites (right) at 1, 3, 10 bar. Bulk composition of the mixture is equimolar.

## Section S4. Relationship between API and APS metrics

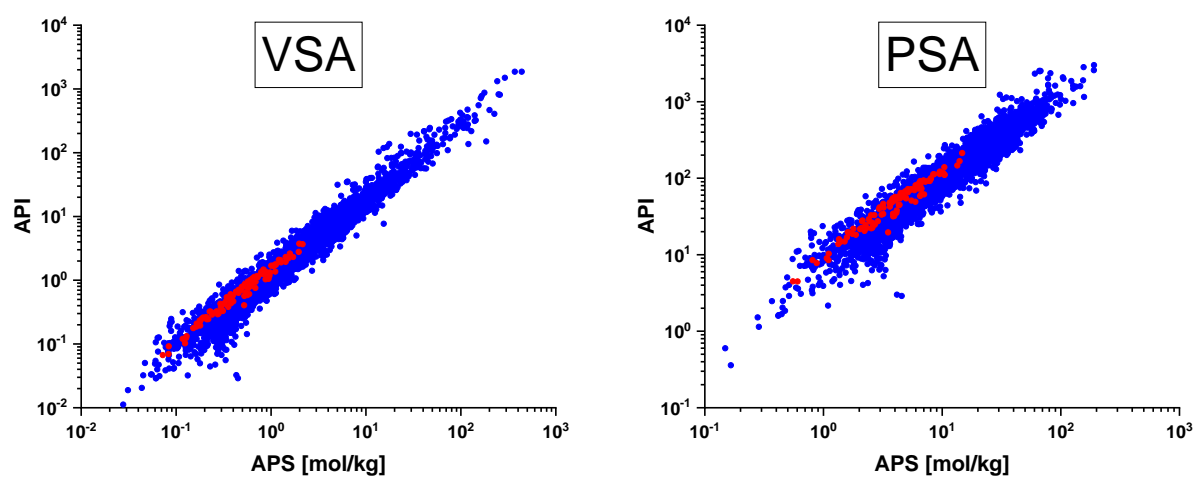

**Figure S7.** Relationship between API and APS metrics for vacuum swing adsorption (left) and pressure swing adsorption (right). Metal-organic frameworks are marked with blue dots, zeolites are marked with red dots.

## Section S5. Comparison of the structural properties PDF for the best 50 MOF structures for VSA and PSA with all MOF structures

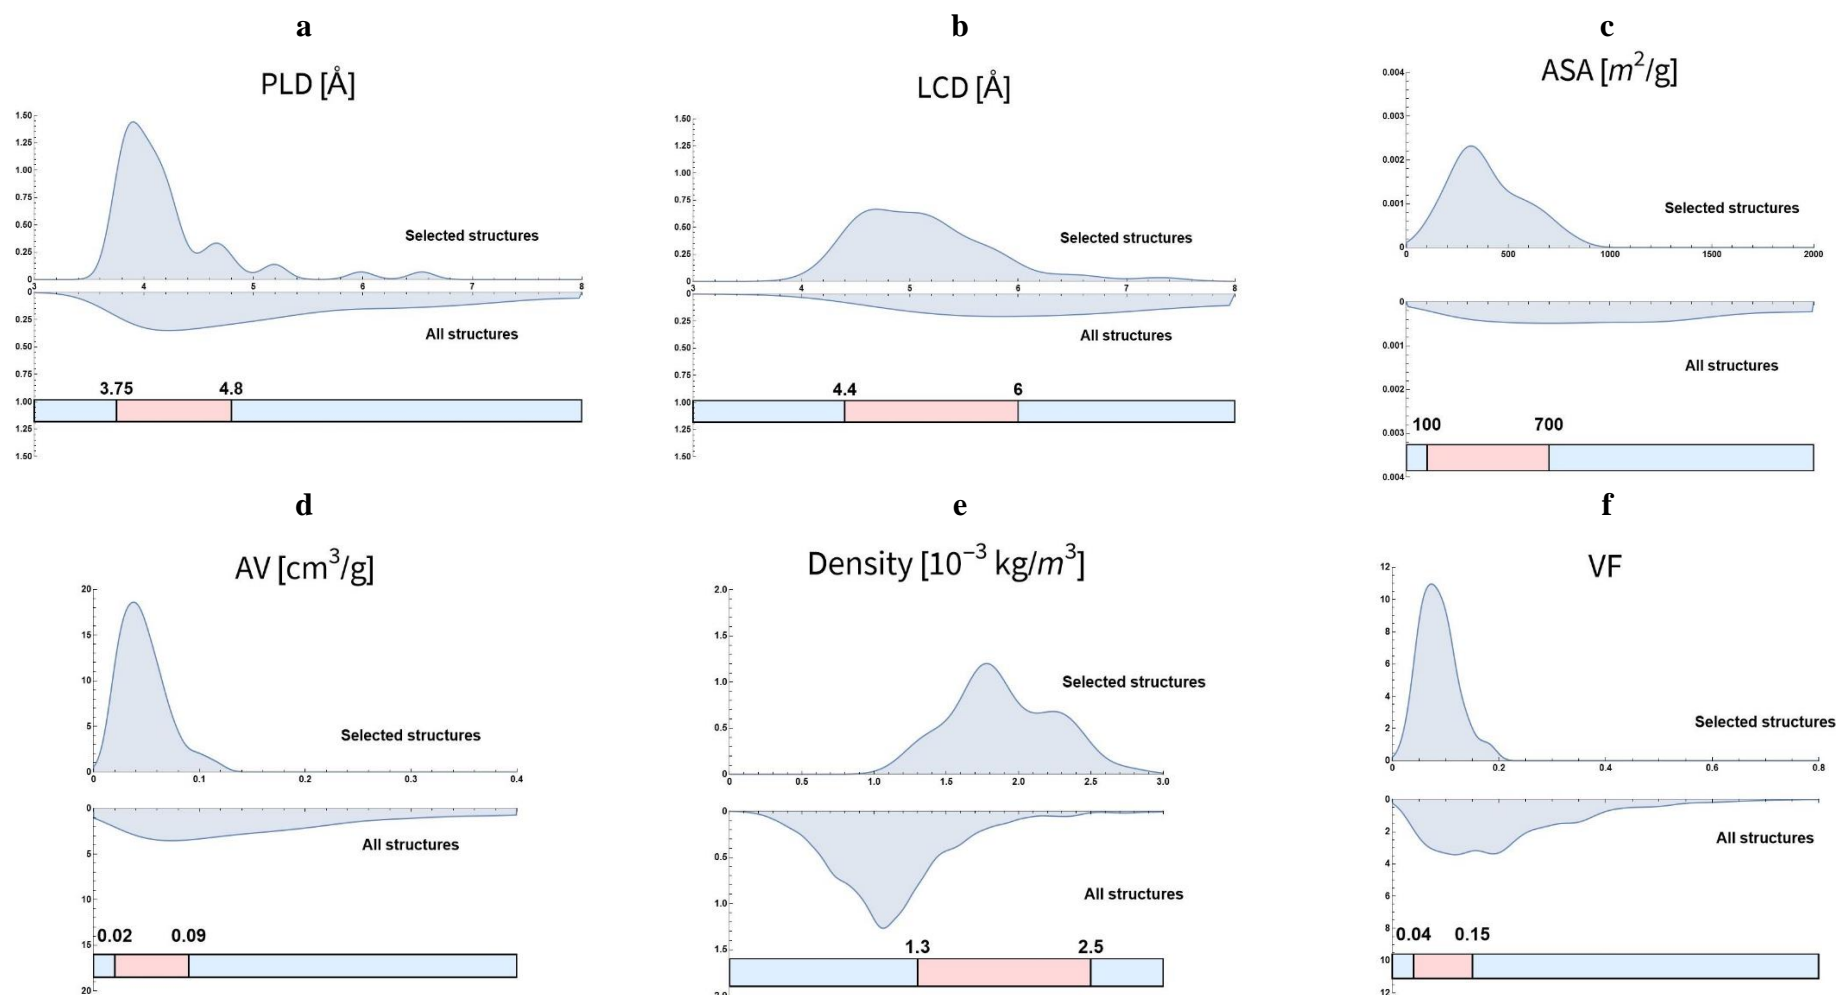

**Figure S8.** Comparison of the smoothed probability density distribution (PDF) of structural properties for the best 50 MOF structures with all MOF structures considered in this study for the VSA separation process. The bottom of each figure shows the range of effective structural properties that comprise over 90% of the Top 50 MOFs database for VSA.

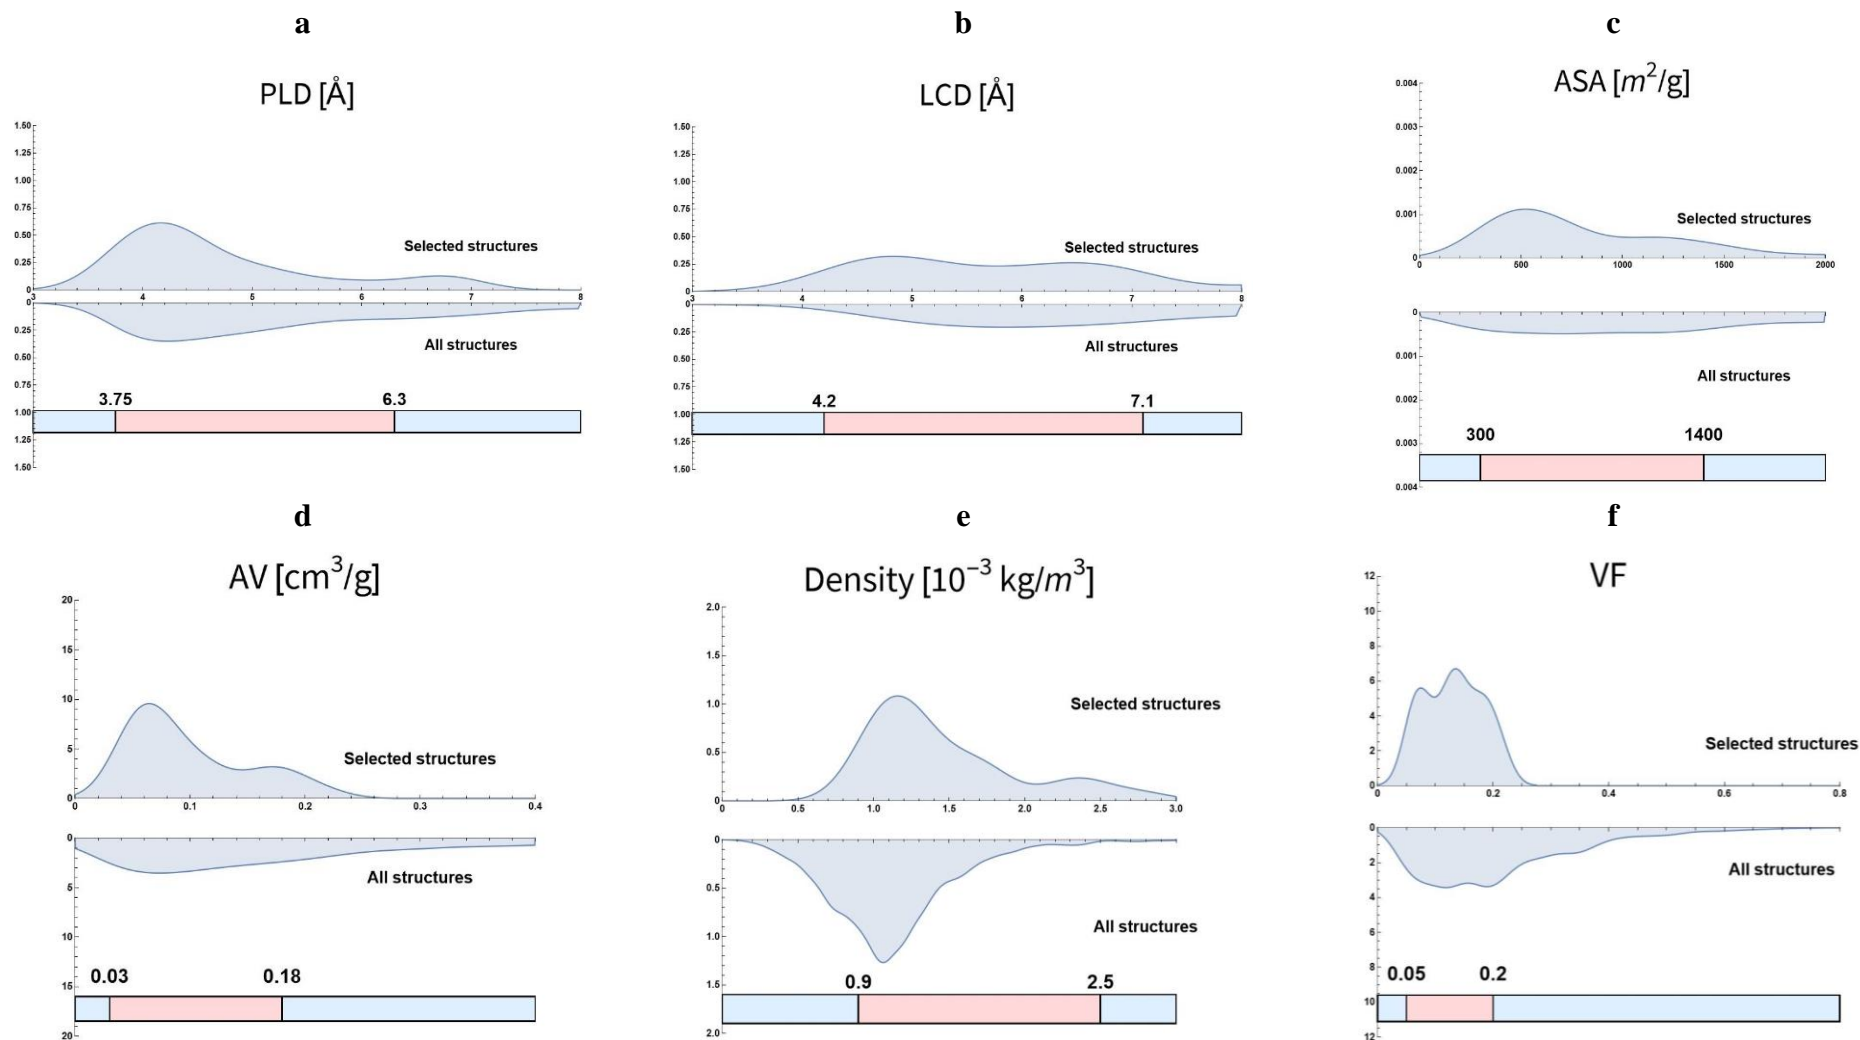

**Figure S9.** Comparison of the smoothed probability density distribution (PDF) of structural properties for the best 50 MOF structures with all MOF structures considered in this study for the PSA separation process. The bottom of each figure shows the range of effective structural properties that comprise over 90% of the Top 50 MOFs database for PSA.

## Section S6. Characteristics of Top 10 MOFs for adsorption-based separation

**Table S6.** Characteristics of Top 10 MOFs for VSA separation.

| Type | Structure | LCD [Å] /<br>PLD [Å] | R    | $\Delta N$<br>[mol/kg] | $S_{ads,N_2/He}^{mix}$ | API  | APS<br>[mol/kg] |
|------|-----------|----------------------|------|------------------------|------------------------|------|-----------------|
| MOF  | SEHVOQ    | 5.95 / 3.89          | 0.85 | 1.35                   | 324.4                  | 1858 | 438             |
| MOF  | FIVQOR    | 4.64 / 4.07          | 0.83 | 1.03                   | 359.4                  | 1861 | 370             |
| MOF  | ZUTBUN    | 4.44 / 3.87          | 0.83 | 0.91                   | 320.9                  | 1493 | 290             |
| MOF  | UZATAR    | 4.92 / 3.77          | 0.83 | 0.71                   | 361.1                  | 809  | 257             |
| MOF  | MITGOL    | 4.98 / 3.86          | 0.85 | 0.72                   | 348.7                  | 822  | 250             |
| MOF  | PONPOX    | 4.57 / 3.78          | 0.82 | 0.85                   | 286.0                  | 1322 | 242             |
| MOF  | POKVAO    | 5.22 / 4.00          | 0.80 | 0.56                   | 400.9                  | 406  | 225             |
| MOF  | WAZCUX    | 5.01 / 4.11          | 0.86 | 0.64                   | 315.2                  | 467  | 200             |
| MOF  | XUJSAY    | 5.28 / 3.82          | 0.82 | 0.43                   | 428.4                  | 150  | 185             |
| MOF  | MUVMOG    | 4.19 / 3.80          | 0.88 | 0.92                   | 191.9                  | 870  | 177             |

**Table S7.** Characteristics of Top 10 MOFs for PSA separation.

| Type | Structure | LCD [Å] /<br>PLD [Å] | R    | $\Delta N$ [mol/kg] | $S_{ads,N_2/He}^{mix}$ | APS [mol/kg] |
|------|-----------|----------------------|------|---------------------|------------------------|--------------|
| MOF  | POLBIB    | 4.83 / 4.17          | 0.83 | 2.41                | 79.1                   | 190          |
| MOF  | CAYKEU    | 6.78 / 5.32          | 0.81 | 2.24                | 85.1                   | 190          |
| MOF  | ZAGHAT    | 4.21 / 3.99          | 0.82 | 2.08                | 75.7                   | 157          |
| MOF  | COQNIF    | 8.24 / 5.80          | 0.83 | 2.95                | 52.7                   | 156          |
| MOF  | TOPKIT    | 8.18 / 5.07          | 0.83 | 3.49                | 44.1                   | 154          |
| MOF  | NEYZAU    | 5.01 / 4.01          | 0.82 | 3.19                | 45.7                   | 146          |
| MOF  | KIRTUC    | 4.52 / 3.79          | 0.81 | 2.14                | 63.3                   | 135          |
| MOF  | ABULOB    | 4.51 / 3.77          | 0.82 | 2.10                | 60.8                   | 127          |
| MOF  | UXABOL    | 5.11 / 4.47          | 0.82 | 1.32                | 96.2                   | 127          |
| MOF  | NEFZOO    | 4.77 / 4.31          | 0.83 | 2.51                | 50.6                   | 127          |



## Section S7. Effect of electrostatic interaction on He/N<sub>2</sub> separation

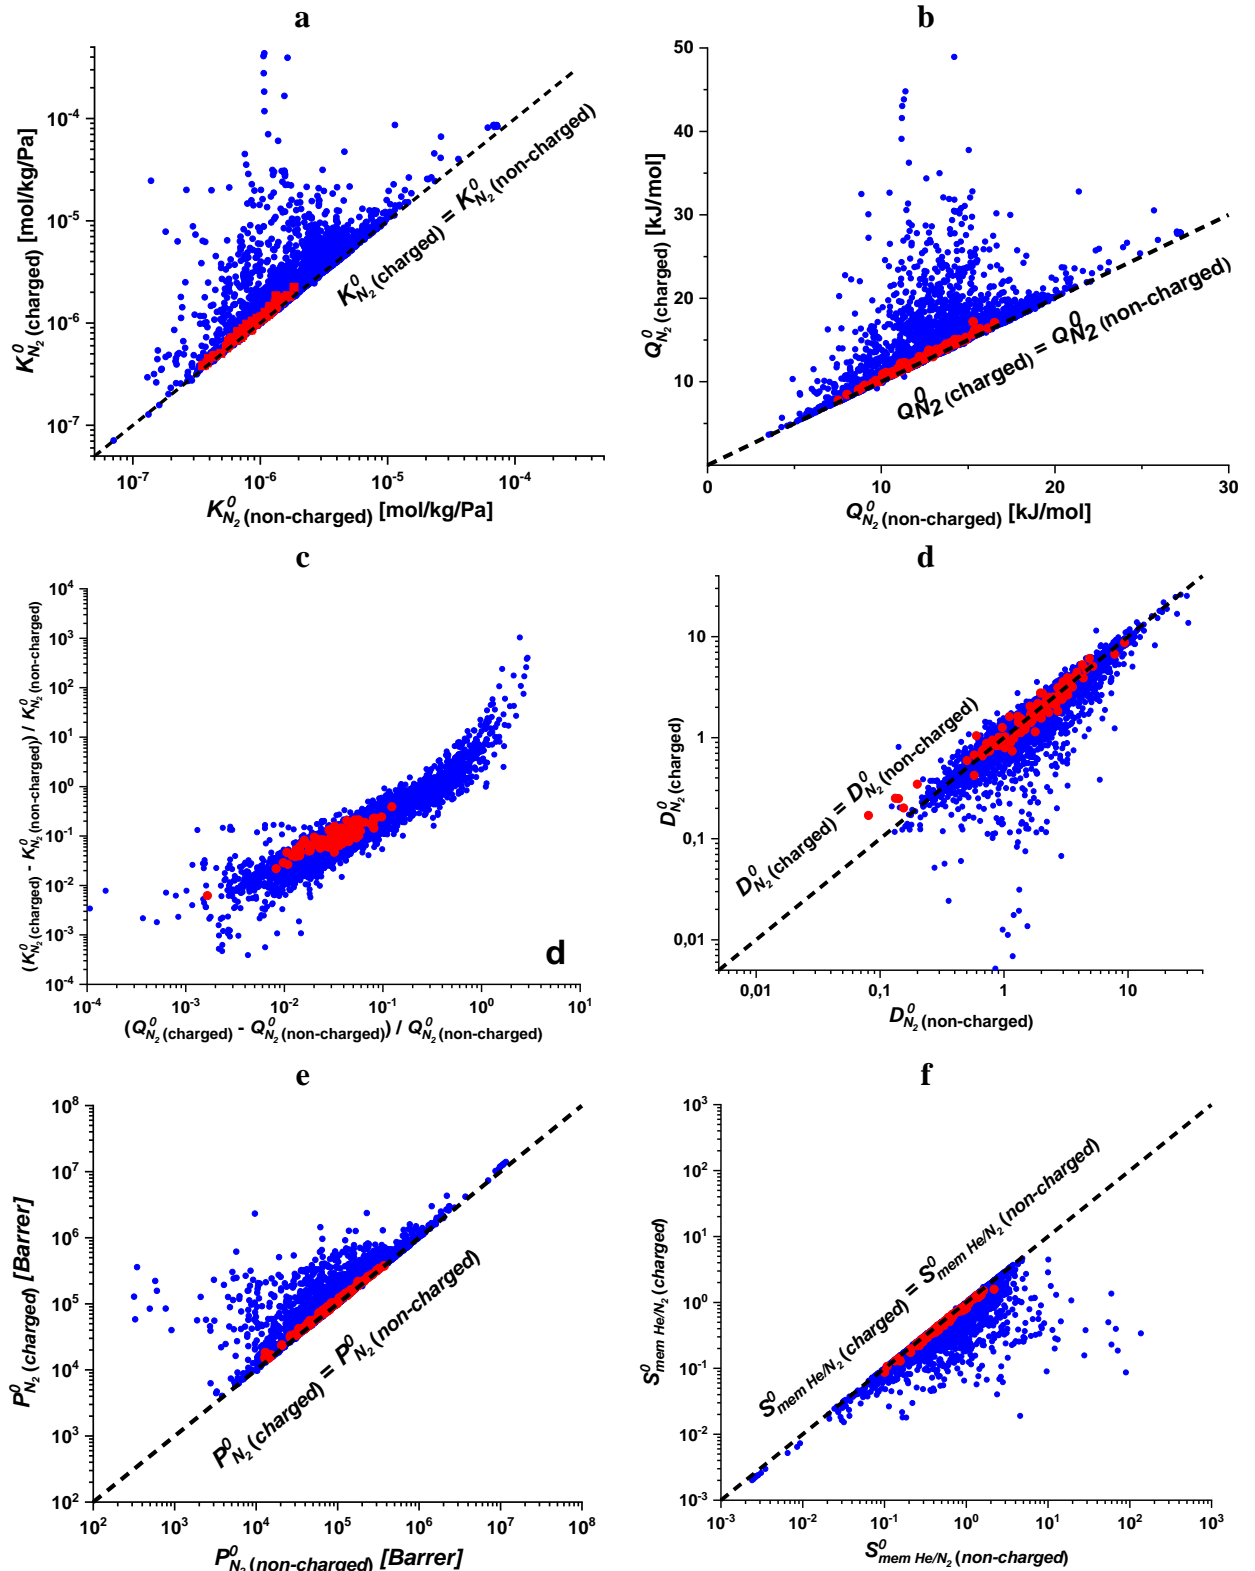

**Figure S10.** Influence of electrostatic interaction between N<sub>2</sub> molecules and adsorbent atoms on Henry's adsorption constant (a), adsorption enthalpy (b), Henry's constant - adsorption enthalpy relationship (c), diffusion coefficient (d), permeability (e) and membrane selectivity (f). Metal-organic frameworks are marked with blue dots, zeolites are marked with red dots.

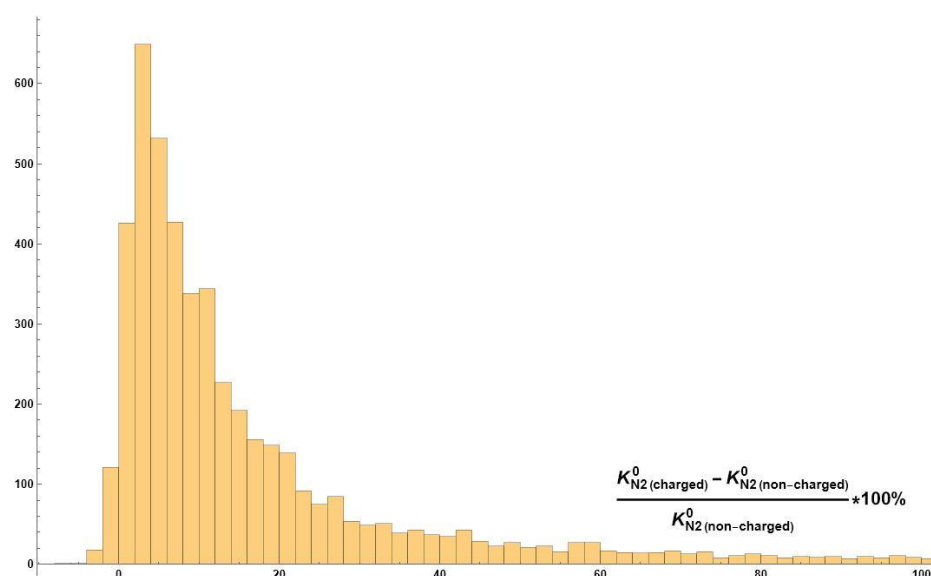

**Figure S11.** Influence of electrostatic interaction on N<sub>2</sub> Henry's adsorption constant.

## Section S8. Structure – diffusion performance relationships

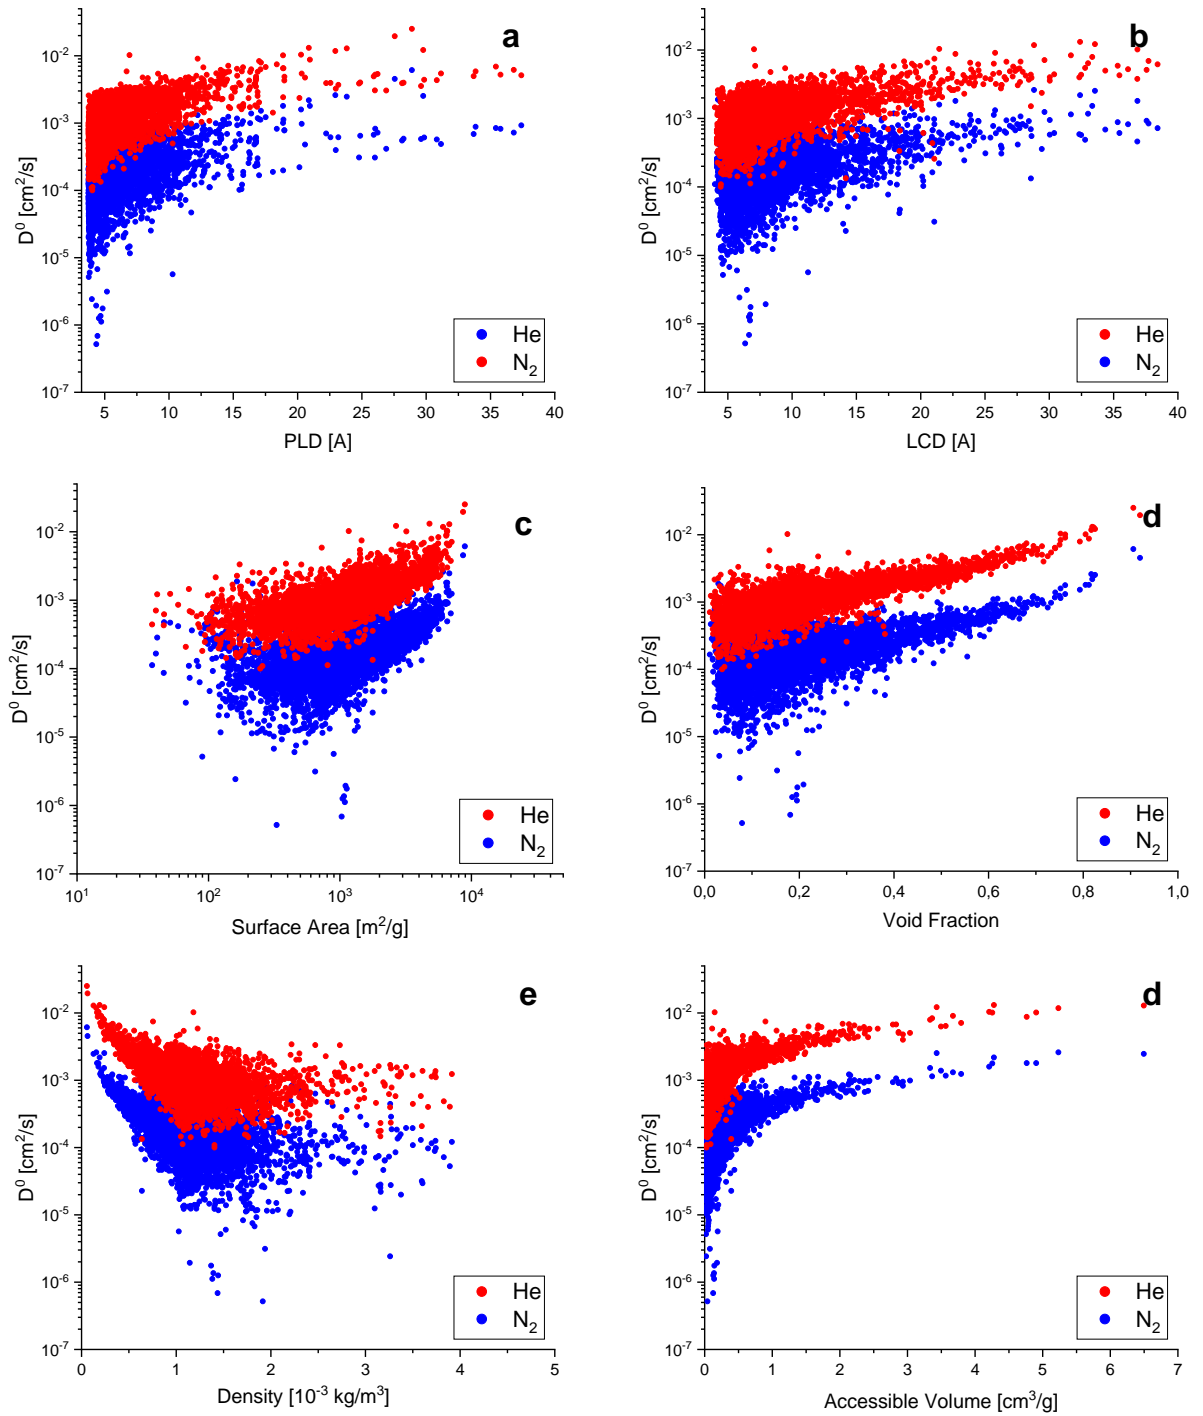

**Figure S12.** Diffusion coefficient ( $D^0$ ) versus pore limiting diameter (a), largest cavity diameter (b), accessible surface area (c), porosity (d), density (e) and accessible volume (f) for He and N<sub>2</sub>.

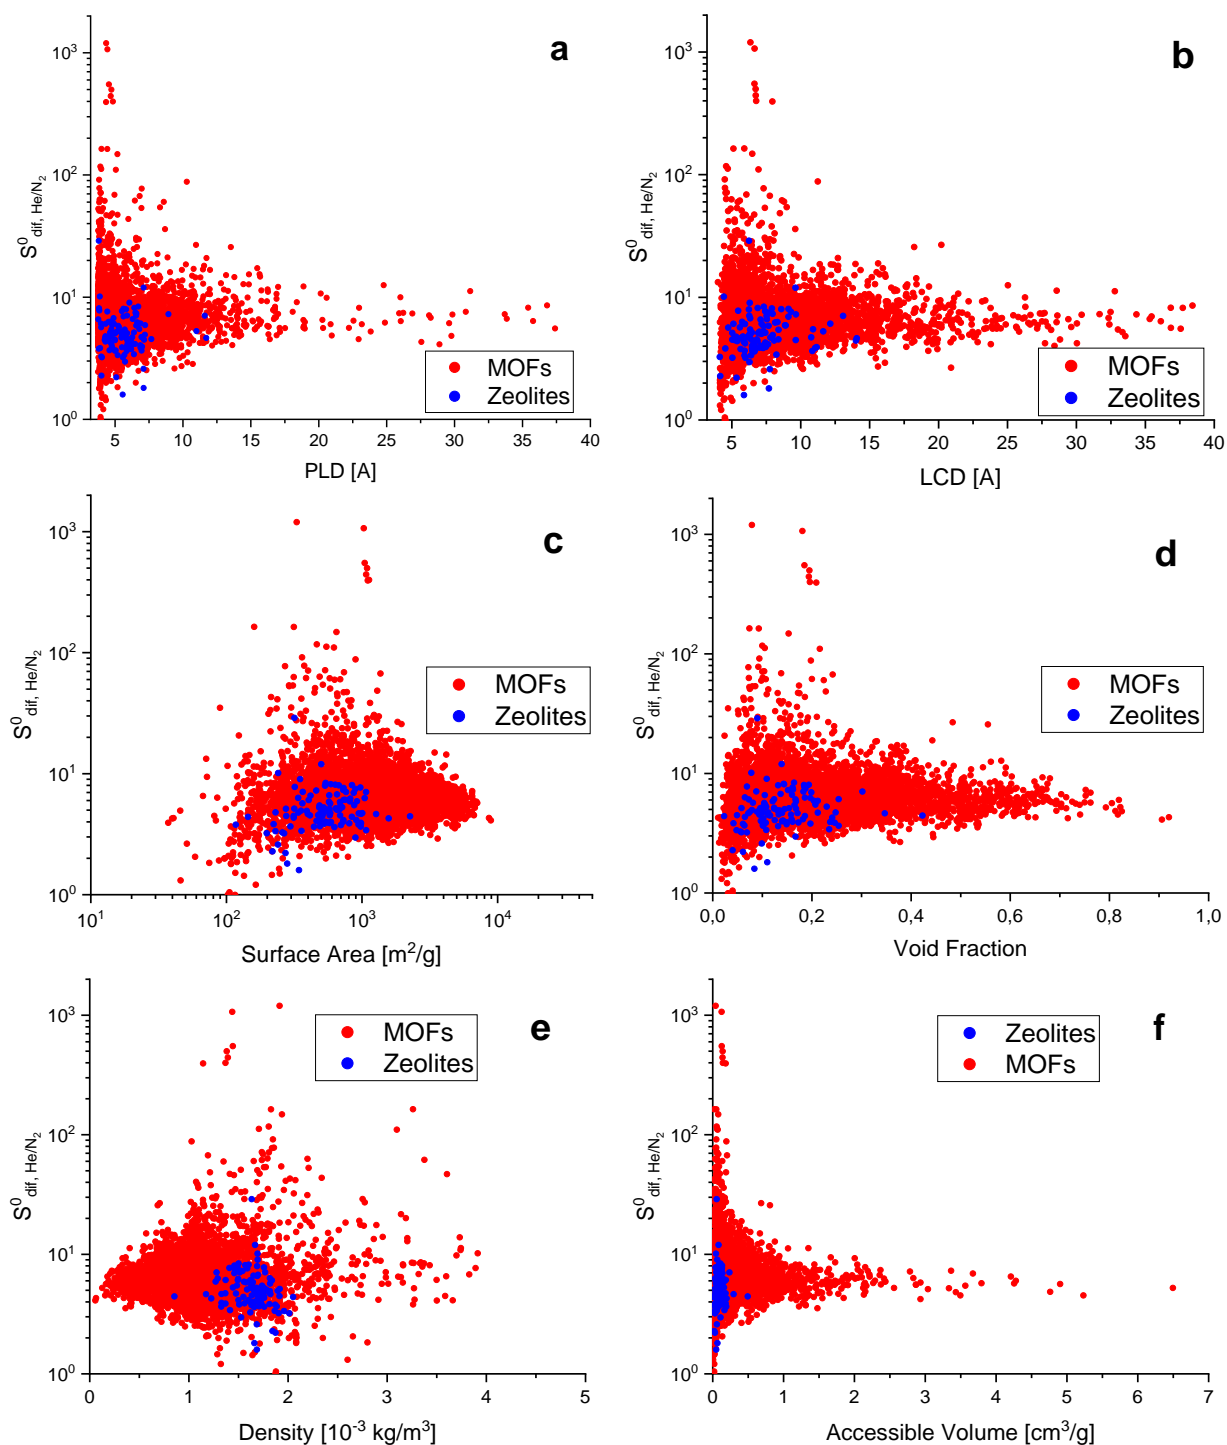

**Figure S13.** Diffusion selectivity ( $S^0_{dif, He/N_2}$ ) versus pore limiting diameter (a), largest cavity diameter (b), accessible surface area (c), porosity (d), density (e) and accessible volume (f) for MOF and zeolites structures.

**Section S9. Comparison of the structural properties PDF for the best 50 MOF structures for membrane separation process with all MOF structures**

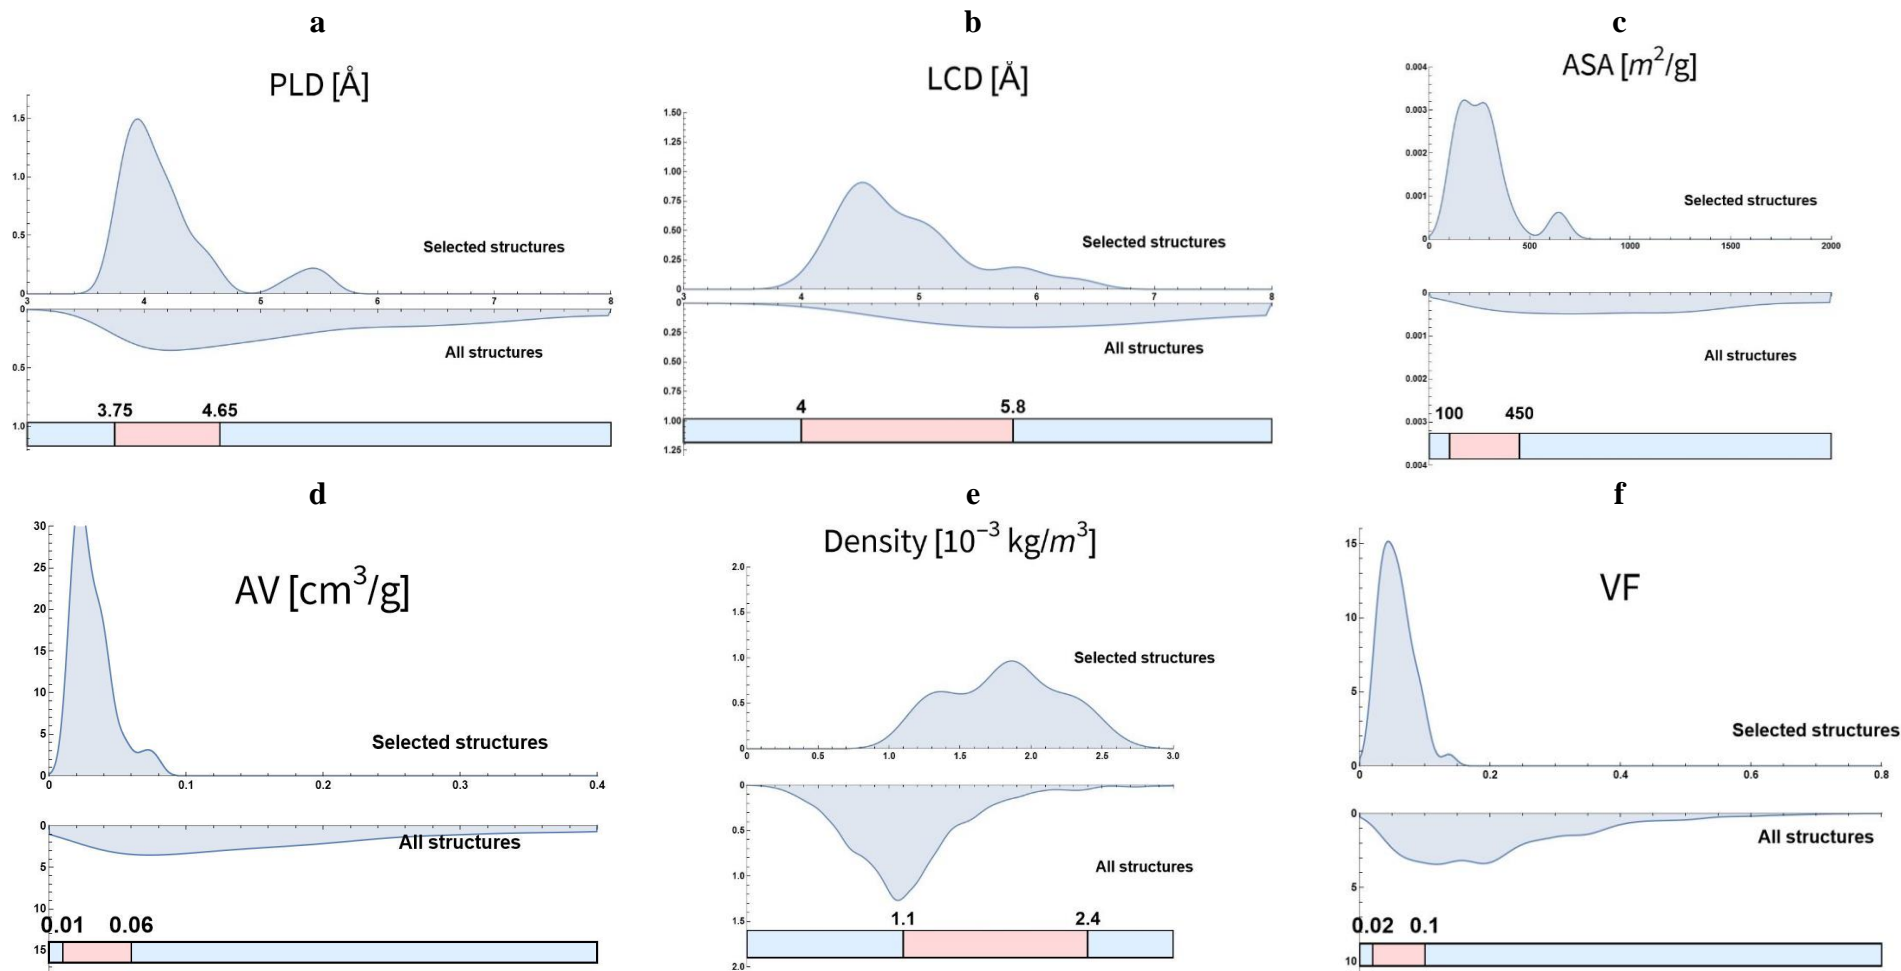

**Figure S14.** Comparison of the smoothed probability density distribution (PDF) of structural properties for the best 50 MOF structures with all MOF structures considered in this study for membrane separation process. The bottom of each figure shows the range of effective structural properties that comprise over 90% of the Top 50 MOF structures for membrane separation process.

Top 50 MOF structures for membrane separation

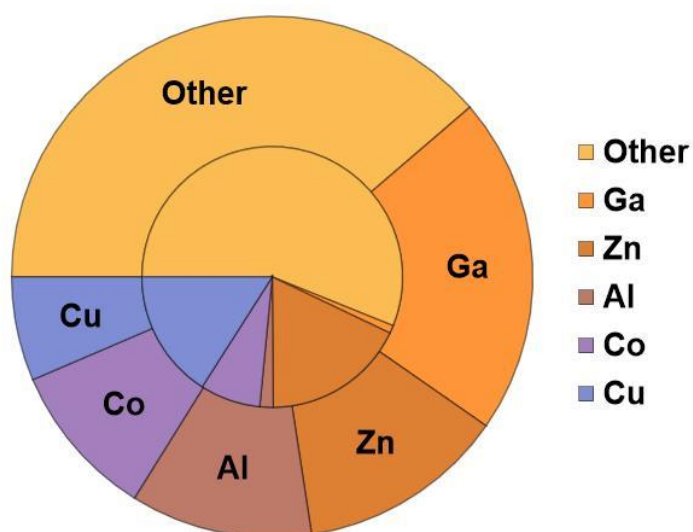

**Figure S15.** Chemical composition distribution of MOFs by metal type. The outer pie chart corresponds to the Top 50 best MOFs, the inner one corresponds to all MOFs considered in this study.

## Section S11. Characteristics of Top 10 MOFs for membrane-based separation

**Table S8.** Characteristics of Top 10 MOFs for membrane separation.

| CCDC Identifier | LCD [Å] / PLD [Å] | $S_{ads\ N_2/He}^0$ | $S_{ads\ N_2/He}^{mix}$ | $S_{dif\ He/N_2}^0$ | $S_{dif\ He/N_2}^{mix}$ | $P_{N_2}^0$ [barrer] | $P_{N_2}^{mix}$ [Barrer] | $S_{mem\ N_2/He}^0$ | $S_{mem\ N_2/He}^{mix}$ |
|-----------------|-------------------|---------------------|-------------------------|---------------------|-------------------------|----------------------|--------------------------|---------------------|-------------------------|
| MISQIQ *        | 4.16 / 3.92       | 885                 | 565                     | 2.1                 | 1.3                     | $1.22 \times 10^7$   | $3.20 \times 10^5$       | 427                 | 434                     |
| MORZID          | 4.20 / 3.99       | 694                 | 490                     | 3.6                 | 1.6                     | $2.98 \times 10^6$   | $6.58 \times 10^4$       | 193                 | 306                     |
| FIJYED          | 4.74 / 3.99       | 672                 | 366                     | 4.3                 | 2.4                     | $2.48 \times 10^6$   | $6.08 \times 10^4$       | 156                 | 152                     |
| QOLVET          | 4.19 / 3.99       | 693                 | 485                     | 5.1                 | 3.2                     | $2.97 \times 10^6$   | $6.25 \times 10^4$       | 137                 | 151                     |
| QIWDOR          | 4.48 / 4.05       | 98                  | 92                      | 1.5                 | 1.1                     | $3.00 \times 10^6$   | $6.79 \times 10^5$       | 66                  | 83                      |
| SEHVOQ          | 5.95 / 3.89       | 345                 | 301                     | 6.2                 | 3.9                     | $2.36 \times 10^6$   | $3.04 \times 10^5$       | 56                  | 77                      |
| WAZCUX          | 5.01 / 4.11       | 325                 | 270                     | 5.8                 | 4.0                     | $1.28 \times 10^6$   | $1.24 \times 10^5$       | 56                  | 68                      |
| QOKCID          | 4.30 / 3.82       | 98                  | 94                      | 1.8                 | 1.4                     | $1.32 \times 10^6$   | $3.92 \times 10^5$       | 55                  | 67                      |
| VUHJAK          | 4.40 / 4.24       | 134                 | 113                     | 2.2                 | 2.0                     | $4.56 \times 10^5$   | $5.38 \times 10^4$       | 61                  | 57                      |
| IWELIG**        | 4.57 / 4.44       | 137                 | 121                     | 2.4                 | 2.4                     | $2.66 \times 10^6$   | $4.45 \times 10^5$       | 58                  | 50                      |

\*Since the CoRE Mof 2019 database contains 8 possible models of the same MISQIQ structure, the table shows averaged data for all MISQIQ structure models.

\*\*Since the CoRE Mof 2019 database contains 2 possible models of the same IWELIG structure, the table shows averaged data for all IWELIG structure models.

## References

1. Malbrunot, P.; Vidal, D.; Vermesse, J.; Chahine, R.; Bose, T.K. Adsorbent Helium Density Measurement and Its Effect on Adsorption Isotherms at High Pressure. *Langmuir* **1997**, *13*, 539–544, doi:10.1021/la950969e.
2. Khoramzadeh, E.; Mofarahi, M.; Lee, C.-H. Equilibrium Adsorption Study of CO<sub>2</sub> and N<sub>2</sub> on Synthesized Zeolites 13X, 4A, 5A, and Beta. *J. Chem. Eng. Data* **2019**, *64*, 5648–5664, doi:10.1021/acs.jced.9b00690.
3. Sava Gallis, D.F.; Parkes, M.V.; Greathouse, J.A.; Zhang, X.; Nenoff, T.M. Enhanced O<sub>2</sub> Selectivity versus N<sub>2</sub> by Partial Metal Substitution in Cu-BTC. *Chem. Mater.* **2015**, *27*, 2018–2025, doi:10.1021/cm5042293.
4. Chowdhury, P.; Bikkina, C.; Meister, D.; Dreisbach, F.; Gumma, S. Comparison of Adsorption Isotherms on Cu-BTC Metal Organic Frameworks Synthesized from Different Routes. *Microporous Mesoporous Mater.* **2009**, *117*, 406–413, doi:10.1016/j.micromeso.2008.07.029.
5. Saha, D.; Bao, Z.; Jia, F.; Deng, S. Adsorption of CO<sub>2</sub>, CH<sub>4</sub>, N<sub>2</sub> O, and N<sub>2</sub> on MOF-5, MOF-177, and Zeolite 5A. *Environ. Sci. Technol.* **2010**, *44*, 1820–1826, doi:10.1021/es9032309.
6. Kloutse, F.A.; Hourri, A.; Natarajan, S.; Benard, P.; Chahine, R. Experimental Benchmark Data of CH<sub>4</sub>, CO<sub>2</sub> and N<sub>2</sub> Binary and Ternary Mixtures Adsorption on MOF-5. *Sep. Purif. Technol.* **2018**, *197*, 228–236, doi:10.1016/j.seppur.2018.01.013.
7. Li, T.; Chen, D.-L.; Sullivan, J.E.; Kozlowski, M.T.; Johnson, J.K.; Rosi, N.L. Systematic Modulation and Enhancement of CO<sub>2</sub> : N<sub>2</sub> Selectivity and Water Stability in an Isoreticular Series of Bio-MOF-11 Analogues. *Chem. Sci.* **2013**, *4*, 1746, doi:10.1039/c3sc22207a.
8. Cmarik, G.E.; Kim, M.; Cohen, S.M.; Walton, K.S. Tuning the Adsorption Properties of UiO-66 via Ligand Functionalization. *Langmuir* **2012**, *28*, 15606–15613, doi:10.1021/la3035352.
9. Dubskikh, V.A.; Lysova, A.A.; Samsonenko, D.G.; Lavrov, A.N.; Kovalenko, K.A.; Dybtsev, D.N.; Fedin, V.P. 3D Metal–Organic Frameworks Based on Co(II) and Bithiophendicarboxylate: Synthesis, Crystal Structures, Gas Adsorption, and Magnetic Properties. *Molecules* **2021**, *26*, 1269, doi:10.3390/molecules26051269.
10. Pham, T.D.; Xiong, R.; Sandler, S.I.; Lobo, R.F. Experimental and Computational Studies on the Adsorption of CO<sub>2</sub> and N<sub>2</sub> on Pure Silica Zeolites. *Microporous Mesoporous Mater.* **2014**, *185*, 157–166, doi:10.1016/j.micromeso.2013.10.030.
11. Predescu, L.; Tezel, F.H.; Chopra, S. Adsorption of Nitrogen, Methane, Carbon Monoxide, and Their Binary Mixtures on Aluminophosphate Molecular Sieves. *Adsorption* **1997**, *3*, 7–25, doi:10.1007/BF01133003.
12. Li, S.; Chen, J.; Wang, Y.; Li, K.; Li, K.; Guo, W.; Zhang, X.; Liu, J.; Tang, X.; Yang, J.; et al. Adsorption and Separation of CH<sub>4</sub>/N<sub>2</sub> by Electrically Neutral Skeleton AlPO Molecular Sieves. *Sep. Purif. Technol.* **2022**, *286*, 120497, doi:10.1016/j.seppur.2022.120497.
13. Cao, F.; Zhang, C.; Xiao, Y.; Huang, H.; Zhang, W.; Liu, D.; Zhong, C.; Yang, Q.; Yang, Z.; Lu, X. Helium Recovery by a Cu-BTC Metal–Organic-Framework Membrane. *Ind. Eng. Chem. Res.* **2012**, *51*, 11274–11278, doi:10.1021/ie301445p.
14. Zhao, Z.; Ma, X.; Li, Z.; Lin, Y.S. Synthesis, Characterization and Gas Transport Properties of MOF-5 Membranes. *J. Membr. Sci.* **2011**, *382*, 82–90, doi:10.1016/j.memsci.2011.07.048.
15. Zhang, Y.; Gao, Q.; Lin, Z.; Zhang, T.; Xu, J.; Tan, Y.; Tian, W.; Jiang, L. Constructing Free Standing Metal Organic Framework MIL-53 Membrane Based on Anodized Aluminum Oxide Precursor. *Sci. Rep.* **2015**, *4*, 4947, doi:10.1038/srep04947.
16. Kasik, A.; Dong, X.; Lin, Y.S. Synthesis and Stability of Zeolitic Imidazolate Framework-68 Membranes. *Microporous Mesoporous Mater.* **2015**, *204*, 99–105, doi:10.1016/j.micromeso.2014.10.050.
17. Hara, N.; Yoshimune, M.; Negishi, H.; Haraya, K.; Hara, S.; Yamaguchi, T. Diffusive Separation of Propylene/Propane with ZIF-8 Membranes. *J. Membr. Sci.* **2014**, *450*, 215–223, doi:10.1016/j.memsci.2013.09.012.
18. Yoo, Y.; Varela-Guerrero, V.; Jeong, H.-K. Isoreticular Metal–Organic Frameworks and Their Membranes with Enhanced Crack Resistance and Moisture Stability by Surfactant-Assisted Drying. *Langmuir* **2011**, *27*, 2652–2657, doi:10.1021/la104775d.
19. Tomita, T.; Nakayama, K.; Sakai, H. Gas Separation Characteristics of DDR Type Zeolite Membrane. *Microporous Mesoporous Mater.* **2004**, *68*, 71–75, doi:10.1016/j.micromeso.2003.11.016.
20. Liu, Y.; Zhang, B.; Liu, D.; Sheng, P.; Lai, Z. Fabrication and Molecular Transport Studies of Highly C-Oriented AFI Membranes. *J. Membr. Sci.* **2017**, *528*, 46–54, doi:10.1016/j.memsci.2017.01.012.
21. Nishiyama, N.; Ueyama, K.; Matsukata, M. Gas Permeation through Zeolite-Alumina Composite Membranes. *AIChE J.* **1997**, *43*, 2724–2730, doi:10.1002/aic.690431318.
